# Supplementary material for: Genetically Matched Human iPS Cells Reveal that Propensity for Cartilage and Bone Differentiation Differs with Clones, not Cell Type of Origin
Source: PLoS One. 2013 Jan 31;8(1):e53771. doi: 10.1371/journal.pone.0053771 (PMC3561398; doi:10.1371/journal.pone.0053771)
Supplement: Table S2 — Genes differentially expressed in DFs and BMSCs. A) Genes highly expressed in DFs compared with BMSCs. B) Genes highly expressed in BMSCs compared with DFs. (XLS) [file pone.0053771.s014.xls]

## Sheet: S2-A
Table S2-A. Genes highly expressed in DFs compared with BMSCs.
Transcripts Cluster Id	genesymbol	refseq
7899284	TRNP1	NM_001013642
7902441	ST6GALNAC5	NM_030965
7902452	AK5	NM_174858|NM_012093
7902527	PTGFR	NM_001039585|NM_000959
7903461	NTNG1	NM_001113226|NM_001113228|NM_014917
7903777	GSTM5	NM_000851
7904572
7905220	ECM1	NM_004425|NM_022664
7906954	PBX1	NM_002585
7909332	CD55	NM_001114752|NM_000574
7909494	SYT14	NR_027458|NM_001146261|NM_001146264|NM_001146262|NM_153262|NR_027459
7909568	DTL	NM_016448
7910022	CNIH3	NM_152495
7910923	FMN2	NM_020066
7914127	IFI6	NM_002038|NM_022872|NM_022873
7914667	CSMD2	NM_052896
7914878	LOC100289612
7916541	DAB1	NM_021080
7917649	TGFBR3	NM_003243
7917875	F3	NM_001993
7917942	FLJ35409
7919815	CTSK	NM_000396
7922130	DPT	NM_001937
7925452	GREM2	NM_022469
7927606	PRKG1	NM_001098512|NM_006258
7929012	STAMBPL1	NM_020799
7929438	HELLS	NM_018063
7932326	CUBN	NM_001081
7934916	CH25H	NM_003956
7936835	CPXM2	NM_198148
7938364	WEE1
7942832	C11orf82	NM_145018
7946245	DCHS1	NM_003737
7947512	PAMR1	NM_015430|NM_001001991
7948332	LPXN	NM_004811|NM_001143995
7950906	CTSC	NM_001814|NM_148170|NM_001114173
7951271	MMP1	NM_002421|NM_001145938
7951284	MMP3	NM_002422
7951351	PDGFD	NM_025208|NM_033135
7951485	SLC35F2	NM_017515
7953218	RAD51AP1	NM_001130862|NM_006479
7957570	PLXNC1	NM_005761
7961083	CLEC2B	NM_005127
7964271	PRIM1	NM_000946
7964733	RPSAP52	NR_026825
7965040	PHLDA1	NM_007350
7965094	E2F7	NM_203394
7965335	DUSP6|LOC100131490	NM_001946|NM_022652
7966668	TBX5	NM_181486|NM_000192|NM_080717|NM_080718
7966690	TBX3	NM_016569|NM_005996
7968004	SGCG	NM_000231
7968563	RFC3	NM_002915|NM_181558
7968789	C13orf15	NM_014059
7970513	SKA3|MRP63	NM_145061|NM_001166017|NM_024026
7970763	FLT1	NM_002019|NM_001159920|NM_001160030|NM_001160031
7974335
7974341	GNG2	NM_053064
7977933	SLC7A8	NM_012244|NM_182728
7978846	POLE2	NM_002692
7979281	WDHD1	NM_007086|NM_001008396
7982792	RAD51	NM_002875|NM_133487|NM_001164270|NM_001164269
7983306	WDR76	NM_024908|NM_001167941
7985829	FANCI|POLG	NM_001113378|NM_018193|NM_002693|NM_001126131
7985873	C15orf42	NM_152259
7989647	KIAA0101|CSNK1G1	NM_014736|NM_001029989
7995354	ORC6L	NM_014321
7997336	VAT1L	NM_020927
7999909	GPRC5B	NM_016235
8003204	GINS2	NM_016095
8013341	MFAP4	NM_002404
8014115	MYO1D	NM_015194
8019842	TYMS	NM_001071
8021187	SKA1	NM_001039535|NM_145060
8021946	COLEC12	NM_130386
8022118	EPB41L3	NM_012307
8022612	ZNF521	NM_015461
8027431	ZNF536	NM_014717
8034099	MIR199A1	NR_029586
8034772	ASF1B	NM_018154
8037251	PSG7|PSG4|PSG8|PSG3|PSG1|PSG9|PSG5	NM_002783|NM_002780|NM_001130167
8037272	PSG5|PSG3|PSG8|PSG7|PSG1	NM_002781|NM_001130014|NM_021016
8038213	HSD17B14	NM_016246
8046536	HOXD10	NM_002148
8046695	ITGA4|CERKL	NM_000885|NM_201548|NM_001030311|NM_001030312|NM_001030313|NR_027689|NR_027690|NM_001160277
8047788	ADAM23	NM_003812
8053417	CAPG	NM_001747
8054344	RFX8|hCG_1645516	NM_001145664
8056222	DPP4	NM_001935
8056572	SPC25	NM_020675
8059708	SNORA75	NR_002921
8061471	GINS1	NM_021067
8063437	TSHZ2|LOC100288461	NM_173485
8063444	TSHZ2|LOC100288461
8063536	TFAP2C	NM_003222
8064613	SLC4A11	NM_032034|NM_001174090|NM_001174089
8066074	DSN1	NM_001145316|NM_024918|NM_001145315|NM_001145318|NM_001145317
8069668	CYYR1	NM_052954
8071212	CDC45|CDC45L	NM_001178010|NM_003504|NM_001178011
8072687	MCM5	NM_006739
8077731	FANCD2	NM_033084|NM_001018115
8077970	FBLN2	NM_001004019|NM_001998|NM_001165035
8079237	KIF15	NM_020242
8082745	CCRL1	NM_178445|NM_016557
8082916	IL20RB	NM_144717
8083233	ZIC1	NM_003412
8083494	MME	NM_007288|NM_000902|NM_007287|NM_007289
8083887	CLDN11	NM_005602
8085774	ZNF385D	NM_024697
8085797	THRB	NM_001128176|NM_000461|NM_001128177
8088491	CADPS	NM_003716|NM_183394|NM_183393
8088866	CNTN3	NM_020872
8088952
8090823	SLCO2A1	NM_005630
8091698	SHOX2	NM_003030|NM_006884|NM_001163678
8092839	LRRC15	NM_001135057|NM_130830
8092970	APOD	NM_001647
8094278	NCAPG|LCORL	NM_022346|NM_153686
8094301	SLIT2	NM_004787
8094340	MIR218-1	NR_029631
8096032	PRDM8	NM_020226|NM_001099403
8097356	PLK4	NM_014264
8097991	TDO2	NM_005651
8098423	NEIL3	NM_018248
8102200	DKK2	NM_014421
8103254	SFRP2	NM_003013
8103932	MLF1IP	NM_024629
8104234	TRIP13|BRD9	NM_004237|NM_001166260|NR_027633|NM_023924
8105267	ITGA2	NM_002203
8106573	THBS4	NM_003248
8112376	CENPK	NM_022145
8113433	EFNA5	NM_001962
8117330	HIST1H3A	NM_003529
8117395	HIST1H2BF	NM_003522
8117408	HIST1H2AE	NM_021052
8117426	HIST1H2BH	NM_003524
8117583	HIST1H2AI|HIST1H3H	NM_003509|NM_003536
8117589	HIST1H3H	NM_003536
8117594	HIST1H2BM	NM_003521
8117608	HIST1H2AL	NM_003511
8120719	CD109	NM_133493|NM_001159587|NM_001159588
8121257	PRDM1	NM_001198|NM_182907
8121949	LAMA2	NM_000426|NM_001079823
8122334	CCRL1	NM_178445|NM_016557
8123739	NRN1	NM_016588
8124166	MBOAT1	NM_001080480
8124380	HIST1H1A	NM_005325
8124388	HIST1H3B	NM_003537
8124391	HIST1H2AB	NM_003513
8124416	HIST1H3D|HIST1H2AD	NM_003530|NM_021065
8124437	HIST1H3F	NM_021018
8124440	HIST1H3G	NM_003534
8124527	HIST1H1B	NM_005322
8124531	HIST1H3I	NM_003533
8124534	HIST1H4L	NM_003546
8124537	HIST1H3J	NM_003535
8129573	MOXD1	NM_015529
8130374	FBXO5	NM_012177|NM_001142522
8131666	ITGB8	NM_002214
8131844	GPNMB	NM_001005340|NM_002510
8134339	PEG10	NM_001040152|NM_015068|NM_001172437|NM_001172438
8135544	FOXP2	NM_148898|NM_148899|NM_148900|NM_001172777|NM_014491|NM_001172766|NM_001172767
8138289	ETV1	NM_004956|NM_001163147|NM_001163148|NM_001163149|NM_001163150|NM_001163151|NM_001163152
8139212	GLI3	NM_000168
8140668	SEMA3A	NM_006080
8140686	SEMA3D	NM_152754
8142981	PODXL	NM_001018111|NM_005397
8144036	XRCC2	NM_005431
8145570	ESCO2	NM_001017420
8146357	MCM4	NM_005914|NM_182746
8147030	STMN2	NM_007029
8147756	BAALC	NM_024812|NM_001024372
8151447	IL7	NM_000880
8151871	CCNE2	NM_057749
8155596
8156905	TMEFF1	NM_003692
8157650	PTGS1	NM_000962|NM_080591
8158183	DNM1	NM_004408|NM_001005336
8169717	GRIA3	NM_007325|NM_000828
8171172	MXRA5	NM_015419
8172043	SRPX	NM_006307|NM_001170750|NM_001170751|NM_001170752
8174598	IL13RA2	NM_000640
8175256	MGC16121	NR_024607
8175261	MIR503	NR_030228
8176234	CLIC2	NM_001289
8176574	LOC652811	XR_042505

## Sheet: S2-B
Table S2-B. Genes highly expressed in BMSCs compared with DFs.
Transcripts Cluster Id	genesymbol	refseq
7898263	FBLIM1	NM_017556|NM_001024215|NM_001024216
7898609	PLA2G5	NM_000929
7898693	ALPL	NM_000478|NM_001127501|NM_001177520
7899627	TINAGL1	NM_022164
7902074	LEPR|LEPROT	NM_002303|NM_001003679|NM_001003680|NM_017526
7902495	NEXN	NM_144573|NM_001172309
7903358	VCAM1	NM_001078|NM_080682
7906919	RGS4	NM_001102445|NM_005613|NM_001113381|NM_001113380
7907249	FMO3	NM_006894|NM_001002294
7909789	TGFB2	NM_001135599|NM_003238
7912157	ERRFI1	NM_018948
7912975	ALDH4A1	NM_003748|NM_001161504|NM_170726
7913694	FUCA1	NM_000147
7915472	SLC2A1	NM_006516
7918323	SORT1	NM_002959
7918426	SLC16A4	NM_004696
7919095	NOTCH2	NM_024408
7920165	FLG	NM_002016
7923386	LMOD1	NM_012134
7924071	KCNH1	NM_172362|NM_002238
7926875	BAMBI	NM_012342
7927964	SRGN	NM_002727
7928429	PLAU|C10orf55	NM_002658|NM_001145031
7929511	ENTPD1	NM_001776|NM_001098175|NM_001164178|NM_001164179|NM_001164182|NM_001164183|NM_001164181
7931977	ITIH5	NM_030569|NM_001001851|NM_032817
7934185	C10orf54	NM_022153
7934570	KCNMA1	NM_001014797|NM_001161352|NM_001161353|NM_002247
7934979	ANKRD1	NM_014391
7936734	FGFR2	NM_000141|NM_022970|NM_001144915|NM_001144916|NM_001144918|NM_001144913|NM_001144917|NM_001144914|NM_001144919
7937039	EBF3	NM_001005463
7937772	IGF2|INS-IGF2	NM_000612|NM_001007139|NM_001127598|NR_003512
7939559	TSPAN18	NM_130783
7942957	PRSS23	NM_007173
7943293	ENDOD1	NM_015036
7943803	DIXDC1	NM_001037954|NM_033425
7945663	LOC402778|CTSD	NM_001170820
7947570	TP53I11	NM_001076787|NM_006034
7948987	PLA2G16	NM_007069|NM_001128203
7951662	CRYAB	NM_001885
7952205	MCAM	NM_006500
7953428	CD4	NM_000616
7954065	GPRC5A	NM_003979
7954511	STK38L	NM_015000
7955613	KRT7	NM_005556
7955858	HOXC10	NM_017409
7956018	RDH5	NM_002905
7956271	HSD17B6	NM_003725
7956819	RASSF3	NM_178169
7962058	TMTC1	NM_175861
7962183	AK3L1	NM_001005353|NM_013410|NM_203464
7963786	ITGA5	NM_002205
7963880	ITGA7	NM_001144996|NM_002206|NM_001144997
7964795	IL26	NM_018402
7965573	NTN4	NM_021229
7970033	COL4A2	NM_001846
7970793	SLC46A3	NM_181785|NM_001135919
7972750	COL4A1	NM_001845
7973002	FLJ39632|LOC100287820
7975390	SMOC1	NM_001034852|NM_022137
7975459	SIPA1L1	NM_015556
7976012	NRXN3	NM_004796|NM_001105250|NM_138970
7977452	FLJ39632
7985786	ACAN	NM_013227|NM_001135
7986385	SYNM	NM_145728|NM_015286
7987405	RASGRP1	NM_005739|NM_001128602
7993167	ATF7IP2	NM_024997
8005048	MYOCD	NM_001146312|NM_153604|NM_001146313
8005661	CYTSB	NM_001033553|NM_001033555|NM_152904|NM_001033554
8007931	ITGB3	NM_000212
8011713	CXCL16	NM_022059|NM_001100812
8015179	KRTAP1-5|KRTAP1-3|KRTAP1-1	NM_031957|NM_030966|NM_030967
8015196	KRTAP1-1|KRTAP1-3|KRTAP1-5	NM_030967|NM_030966
8015268	KRT34	NM_021013
8018975	LGALS3BP	NM_005567
8019578	KRTAP1-1|KRTAP1-3	NM_030967|NM_030966
8019588	KRTAP1-5|KRTAP1-3|KRTAP1-1	NM_031957|NM_030966|NM_030967
8020903	GALNT1	NM_020474
8022295	FAM38B|FAM38B2	NM_022068
8023995	FSTL3	NM_005860
8025918	CNN1	NM_001299
8038890	HAS1	NM_001523
8040473	RHOB	NM_004040
8042283	HSPC159	NM_014181
8042637	DYSF	NM_001130978|NM_001130979|NM_003494|NM_001130977|NM_001130980|NM_001130981|NM_001130976|NM_001130455|NM_001130983|NM_001130982|NM_001130987|NM_001130986|NM_001130985|NM_001130984
8042788	ACTG2	NM_001615
8043197	VAMP8	NM_003761
8047763
8048205	IGFBP2	NM_000597
8049544	LRRFIP1	NM_001137550|NM_001137551
8051949	SIX2	NM_016932
8055323	NCKAP5	NM_207363|NM_207481
8057771	STAT4	NM_003151
8058238	ALS2CR11	NM_001168221|NM_152525|NM_001168217|NM_001168216
8058390	RAPH1	NM_213589|NM_203365
8058450	GPR1	NM_005279|NM_001098199
8058869	TNS1	NM_022648
8059525	TM4SF20	NM_024795
8063187	EYA2	NM_005244|NM_172110
8064978	JAG1	NM_000214
8074168	FLJ39632
8075310	LIF|MGC20647	NM_002309
8077490	LMCD1	NM_014583
8078286	RARB|LOC100130354	NM_000965|NM_016152
8078461	FBXL2	NM_012157|NM_001171713
8080714	FLNB	NM_001164317|NM_001457|NM_001164318|NM_001164319
8081590	PHLDB2	NM_001134439|NM_001134438|NM_001134437|NM_145753
8081657	CD200	NM_001004196|NM_005944
8084717	ST6GAL1	NM_173216|NM_003032|NM_173217
8090852	AMOTL2	NM_016201
8091283	PLOD2	NM_182943|NM_000935
8091411	TM4SF1	NM_014220
8091715	LXN	NM_020169
8092707	LEPREL1	NM_018192|NM_001134418
8094228	BST1	NM_004334
8094789	LIMCH1	NM_014988|NM_001112717|NM_001112718|NM_001112719|NM_001112720
8096489	PDLIM5	NM_006457|NM_001011513|NR_024179|NM_001011515|NM_001011516
8096733	SGMS2	NM_001136258|NM_152621|NM_001136257
8097080	SYNPO2	NM_133477|NM_001128933|NM_001128934
8098576	SLC25A4	NM_001151
8098581	SNX25	NM_031953
8099259	AFAP1	NM_198595|NM_001134647
8101788	UNC5C	NM_003728
8102214	PAPSS1	NM_005443
8102440	ARSJ	NM_024590
8102532	PDE5A	NM_001083|NM_033430|NM_033437
8104035	SORBS2	NM_021069|NM_001145671|NM_003603|NM_001145670|NM_001145673|NM_001145672|NM_001145674|NM_001145675
8104746	NPR3	NM_000908
8104758	C5orf23
8107850	CHSY3	NM_175856
8108693	PCDHB4	NM_018938
8108905	KCTD16	NM_020768
8109159	MIR145|LOC728264	NR_029686|NR_027180
8112615	ENC1	NM_003633
8112980	EDIL3	NM_005711
8114354	NME5	NM_003551
8114572	HBEGF	NM_001945
8114970	C5orf46	NM_206966
8115756	KCNMB1	NM_004137
8119067	KCTD20	NM_173562
8121825	RNF217	NM_152553
8121838	TPD52L1	NM_001003395|NM_003287|NM_001003396|NM_001003397
8123246	SLC22A3	NM_021977
8123936	NEDD9	NM_001142393|NM_006403|NM_182966
8127854	ME1	NM_002395
8132710	C7orf69	NM_025031
8135576	TES	NM_015641|NM_152829
8136200	CPA4	NM_016352|NM_001163446
8136248	MEST	NM_002402|NM_177524|NM_177525
8136662	MGAM	NM_004668
8137670	PDGFA|LOC100132080	NM_002607|NM_033023
8139087	SFRP4	NM_003014
8141140	DLX5	NM_005221
8141206	BAIAP2L1	NM_018842
8145055	BMP1	NM_006129|NR_033403|NM_001199|NR_033404
8145134
8145611	FZD3	NM_017412
8146967	CRISPLD1	NM_031461
8150002	FBXO16|ZNF395	NM_172366
8155327	ALDH1B1	NM_000692
8155460	CNTNAP3|CNTNAP3B	NM_033655
8156199	DAPK1	NM_004938
8156826	TGFBR1	NM_004612|NM_001130916
8157727	GPR21	NM_005294
8161288	CNTNAP3|CNTNAP3B	NM_033655
8161865	PRUNE2	NM_015225
8161884	PRUNE2	NM_015225
8162404	ECM2	NM_001393
8163149	PTPN3	NM_002829|NM_001145368|NM_001145369|NM_001145370|NM_001145371|NM_001145372|NR_026918
8174201	BEX1	NM_018476
8174513	CHRDL1	NM_145234|NM_001143981|NM_001143982|NM_001143983
8174654	KLHL13	NM_033495|NM_001168300|NM_001168299|NM_001168301|NM_001168302|NM_001168303
